# Supplementary material
Source: PubMed Central journal article supplement (PMC7505335)
Supplement: NIHMS1626341-supplement-Appendix_Figure.pdf [file NIHMS1626341-supplement-Appendix_Figure.pdf]

## Appendix Figure. Terms used in the search

**KEYWORD AND MeSH:** ((Imaging OR "Tumor markers" OR Transfusions OR "Blood transfusions" OR "Laboratory testing" OR "Secondary testing" OR "Secondary screening" OR "Health services" OR "Diagnostic Techniques and Procedures/statistics and numerical data"[Mesh] OR "Diagnostic Techniques and Procedures/utilization"[Mesh] OR "Biomarkers, Tumor"[Mesh] OR "Blood Transfusion/statistics and numerical data"[Mesh] OR "Health Services/utilization"[Mesh] OR "Clinical Laboratory Services/utilization"[Mesh]) AND (Overuse\* OR Overutiliz\* OR Appropriate\* OR Inappropriate\* OR "Appropriate utilization" OR "Choosing wisely" OR misuse OR "Guideline adherence" OR "Medical Overuse"[Mesh] OR "Health Services Misuse"[Mesh] OR "Health Services/utilization"[Mesh] OR "Guideline Adherence"[Mesh]))

AND

(Harm OR "Patient Harm"[Mesh] OR "Harm Reduction"[Mesh] OR "Medical Errors"[Mesh] OR "Near Miss, Healthcare"[Mesh] OR "quality improvement" OR "Quality Improvement"[Mesh] OR Outcomes OR "Treatment Outcome"[Mesh] OR "Patient Reported Outcome Measures"[Mesh] OR "Outcome Assessment (Health Care)"[Mesh] OR "Patient Outcome Assessment"[Mesh] OR "Critical Care Outcomes"[Mesh])

NOT

("overuse injury" OR "overuse injuries" OR "Cumulative Trauma Disorders"[Mesh])

**KEYWORD ONLY:** ((Imaging OR "Tumor markers" OR Transfusions OR "Blood transfusions" OR "Laboratory testing" OR "Secondary testing" OR "Secondary screening" OR "Health services") AND (Overuse\* OR Overutiliz\* OR Appropriate\* OR Inappropriate\* OR unnecessary OR "Appropriate utilization" OR "Choosing wisely" OR misuse OR "Guideline adherence"))

AND

(harm OR "quality improvement" OR outcomes)

NOT

("overuse injury" OR "overuse injuries")
